# Supplementary material for: Formation of B- and M-group aflatoxins and precursors by Aspergillus flavus on maize and its implication for food safety
Source: PubMed Central journal article supplement (PMC9038868; doi:10.1007/s12550-022-00452-4), 2022-03-15
Supplement: 12550_2022_452_MOESM1_ESM.pdf [file 12550_2022_452_MOESM1_ESM.pdf]

## **Supplementary Information**

### **Formation of B- and M-group aflatoxins and precursors by *Aspergillus flavus* on maize and its implication for food safety**

Alexandra Schamann, Markus Schmidt-Heydt, Rolf Geisen, Sabine E. Kulling and  
Sebastian T. Soukup\*

Max Rubner-Institut (MRI) - Federal Research Institute of Nutrition and Food, Department of Safety and Quality  
of Fruit and Vegetables, Karlsruhe, Germany

\* corresponding author: Sebastian.Soukup@mri.bund.de

**Table S1** Measured levels of aflatoxins and their precursors on autoclaved maize kernels produced by *A. flavus* after 1, 2, 3, 4, 5, 7 and 10 days of incubation. Data are given as arithmetic mean  $\pm$  standard deviation ( $n = 6$ ) in mg/kg maize. Analytes are sorted as follows: group 1 aflatoxin pathway: ST, sterigmatocystin; OMST, O-methylsterigmatocystin; HOMST, 11-hydroxy-O-methylsterigmatocystin; ASP, aspertoxin; HASP, 11-hydroxyaspertoxin; AFB<sub>1</sub>, aflatoxin B<sub>1</sub>; AFM<sub>1</sub>, aflatoxin M<sub>1</sub>; group 2 aflatoxin pathway: DHST, dihydrosterigmatocystin; DHOMST, dihydro-O-methylsterigmatocystin; AFB<sub>2</sub>, aflatoxin B<sub>2</sub>; AFM<sub>2</sub>, aflatoxin M<sub>2</sub>; metabolization product: AFL, aflatoxicol.

| Incubation time [day] | 1                  | 2               | 3               | 4                 | 5                  | 7                  | 10                 |
|-----------------------|--------------------|-----------------|-----------------|-------------------|--------------------|--------------------|--------------------|
| ST                    | < LOQ <sup>a</sup> | 0.03 $\pm$ 0.05 | 0.51 $\pm$ 0.29 | 2.23 $\pm$ 0.26   | 1.12 $\pm$ 0.23    | 0.50 $\pm$ 0.07    | 0.35 $\pm$ 0.03    |
| OMST                  | < LOQ              | 0.89 $\pm$ 0.62 | 2.82 $\pm$ 1.24 | 22.25 $\pm$ 3.46  | 35.29 $\pm$ 5.69   | 33.94 $\pm$ 7.40   | 31.95 $\pm$ 5.25   |
| HOMST <sup>b</sup>    | < LOQ              | < LOQ           | < LOQ           | 1.27 $\pm$ 0.20   | 2.57 $\pm$ 0.42    | 3.14 $\pm$ 0.18    | 3.94 $\pm$ 0.59    |
| ASP <sup>b</sup>      | < LOQ              | 0.11 $\pm$ 0.12 | 0.71 $\pm$ 0.36 | 4.09 $\pm$ 0.37   | 8.06 $\pm$ 1.31    | 10.26 $\pm$ 2.02   | 11.71 $\pm$ 1.39   |
| HASP <sup>b</sup>     | < LOQ              | < LOQ           | 0.04 $\pm$ 0.06 | 0.68 $\pm$ 0.11   | 1.53 $\pm$ 0.26    | 2.04 $\pm$ 0.12    | 3.22 $\pm$ 0.40    |
| AFB <sub>1</sub>      | < LOQ              | 1.90 $\pm$ 1.09 | 7.81 $\pm$ 3.48 | 64.36 $\pm$ 12.42 | 147.28 $\pm$ 19.16 | 208.60 $\pm$ 31.69 | 268.97 $\pm$ 33.70 |
| AFM <sub>1</sub>      | < LOQ              | < LOQ           | 0.07 $\pm$ 0.06 | 0.86 $\pm$ 0.18   | 2.08 $\pm$ 0.28    | 2.95 $\pm$ 0.47    | 4.11 $\pm$ 0.37    |
| DHST <sup>b</sup>     | < LOQ              | < LOQ           | 0.19 $\pm$ 0.47 | 0.06 $\pm$ 0.05   | < LOQ              | < LOQ              | < LOQ              |
| DHOMST <sup>b</sup>   | < LOQ              | < LOQ           | < LOQ           | 0.24 $\pm$ 0.04   | 0.35 $\pm$ 0.05    | 0.34 $\pm$ 0.07    | 0.33 $\pm$ 0.05    |
| AFB <sub>2</sub>      | < LOQ              | < LOQ           | 0.13 $\pm$ 0.09 | 1.91 $\pm$ 0.32   | 4.42 $\pm$ 0.65    | 6.64 $\pm$ 1.80    | 10.23 $\pm$ 1.34   |
| AFM <sub>2</sub>      | < LOQ              | < LOQ           | < LOQ           | < LOQ             | 0.13 $\pm$ 0.01    | 0.37 $\pm$ 0.05    | 0.72 $\pm$ 0.07    |
| AFL                   | < LOQ              | < LOQ           | < LOQ           | 0.07 $\pm$ 0.03   | 0.27 $\pm$ 0.04    | 0.61 $\pm$ 0.13    | 1.16 $\pm$ 0.19    |

<sup>a</sup> < LOQ (limit of quantitation): levels in all replicates were below LOQ (10 nmol/L in the injected sample; in mg/kg maize: ST: 0.06; OMST: 0.07; HOMST: 0.07; ASP: 0.07; HASP: 0.07; AFB<sub>1</sub>: 0.06, AFM<sub>1</sub>: 0.07; DHST: 0.07; DHOMST: 0.07; AFB<sub>2</sub>: 0.06; AFM<sub>2</sub>: 0.07; AFL: 0.06)

<sup>b</sup> Analyte was semi-quantified using the structurally most similar available compound (ST or OMST)
